# Supplementary material
Source: Royal Society of Chemistry journal article supplement (doi:10.1039/d5tc03880d)
Supplement: d5tc03880d1.pdf [file d5tc03880d1.pdf]

## SUPPORTING INFORMATION

### **Spectroscopic Investigation of Phenazine-Based Donor–Acceptor Dyads with Thermally Activated Delayed Fluorescence: Heavy-Halogen Effects on Photosensitizing Properties**

Estera Hoffman,<sup>1</sup> Daria Grzywacz,<sup>2</sup> Michał Mońka,<sup>1</sup> Piotr Bojarski,<sup>1</sup> Illia E. Serdiuk<sup>1\*</sup>

<sup>1</sup> Faculty of Mathematics, Physics and Informatics, University of Gdańsk, Wita Stwosza 57, 80-308 Gdańsk, Poland

<sup>2</sup> Faculty of Chemistry, University of Gdańsk, Wita Stwosza 63, 80-308 Gdańsk, Poland

\*Corresponding author. E-mail: illia.serdiuk@ug.edu.pl, phone + 48 58 523 22 44

## TABLE OF CONTENTS

**Section S1.** DLS measurements

**Section S2.** Photoluminescence measurements

**Section S3.** Calculation results

**Section S4.** NMR, MALDI-TOF spectra of synthesized compounds

## Section S1. DLS measurements

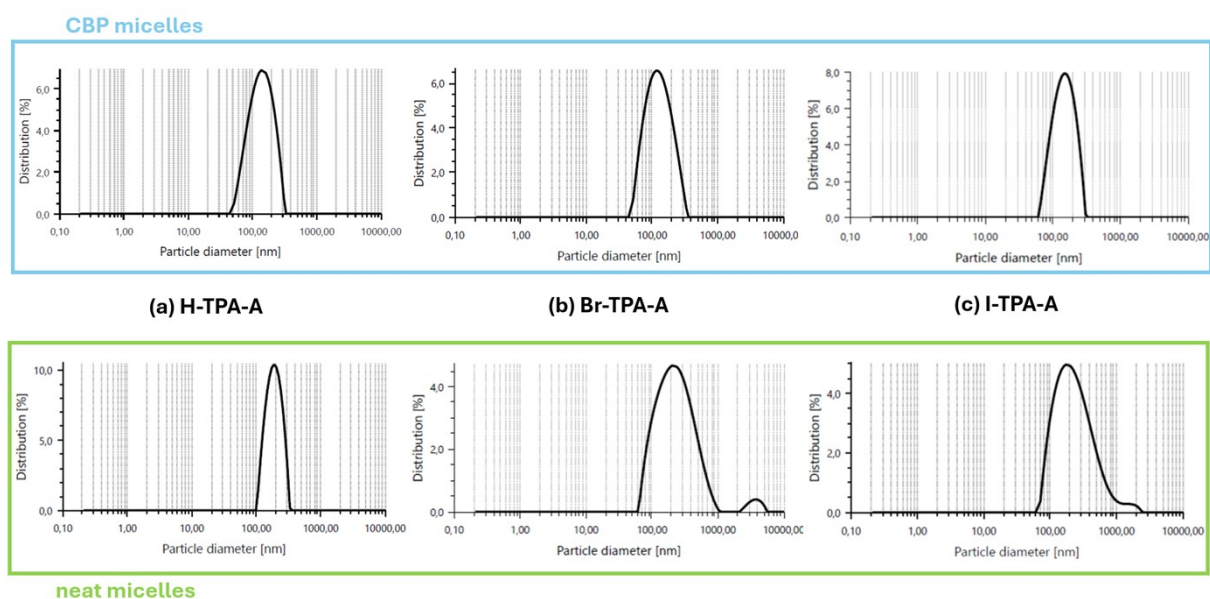

## Section S2. Photoluminescence measurements

**Figure S1.** Particle size distributions based on DLS measurements for R-TPA-A for CBP micelles (blue frame) and neat micelles (green frame).

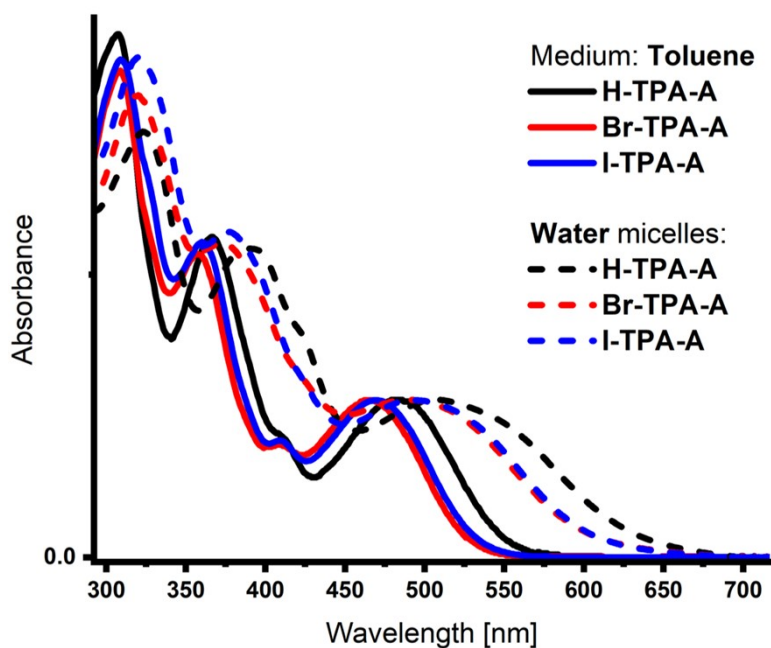

**Figure S2.** Absorption spectra of (A) R-TPA-A in toluene solutions vs. micellar solution in water.

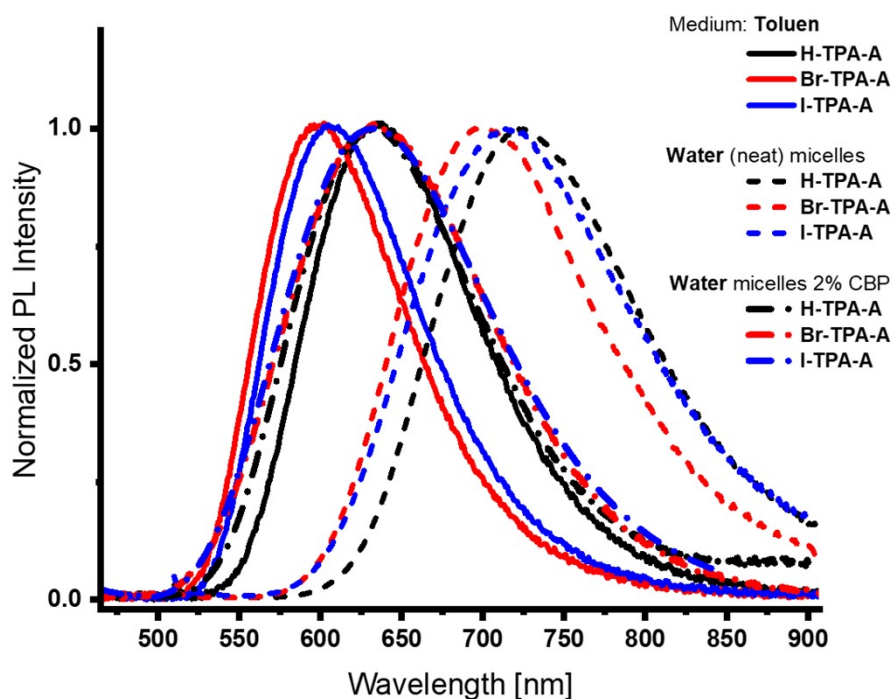

**Figure S3.** Emission spectra of **R-TPA-A** in different media: toluene solutions and water micelles with and without CBP.

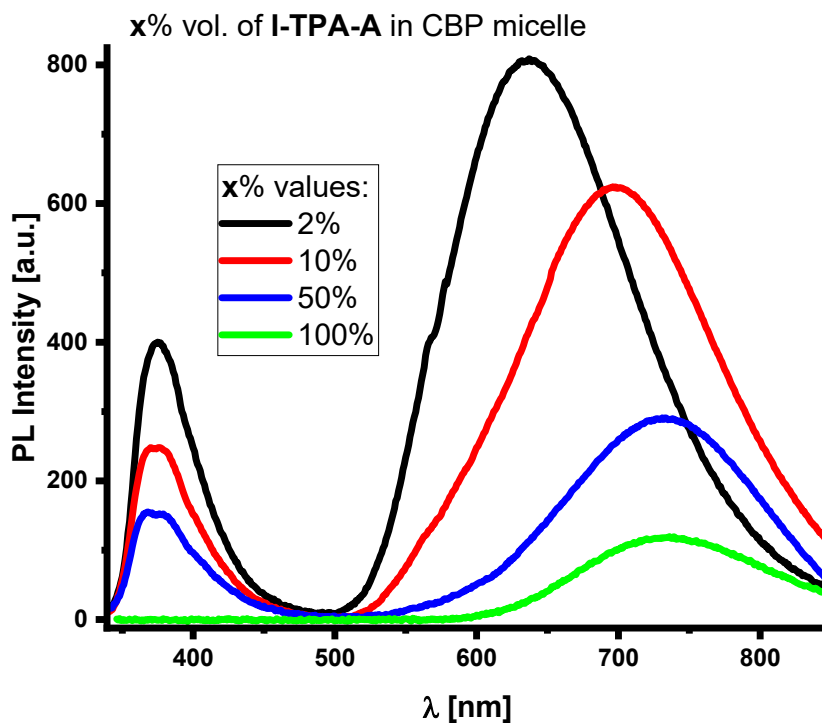

**Figure S4.** Dependence of emission spectral intensity on molar percentage of **I-TPA-A** in micelle.

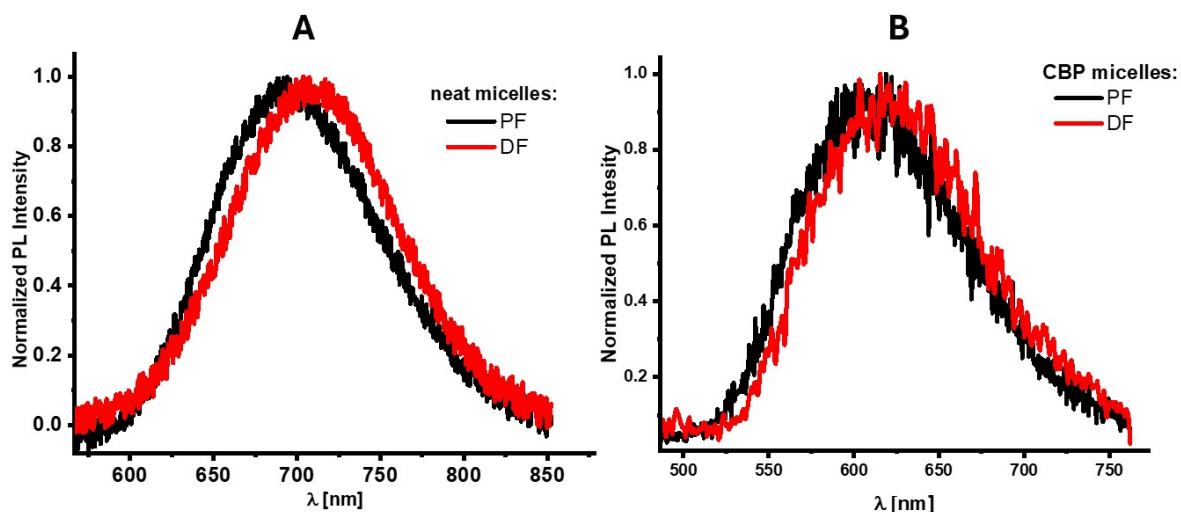

**Figure S5.** Emission spectra of **Br-TPA-A** in prompt fluorescence (PF) and delayed fluorescence (DF) regime of (A) neat micelles and (B) CBP micelles.

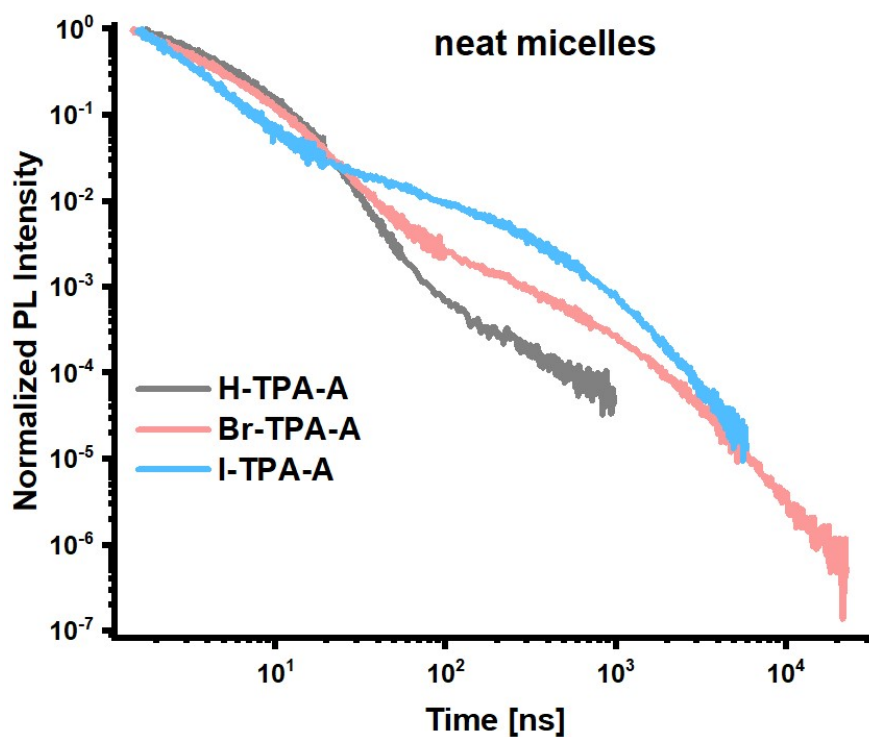

**Figure S6.** The PL Decays of **R-TPA-A** without CBP in micelle (neat micelles).

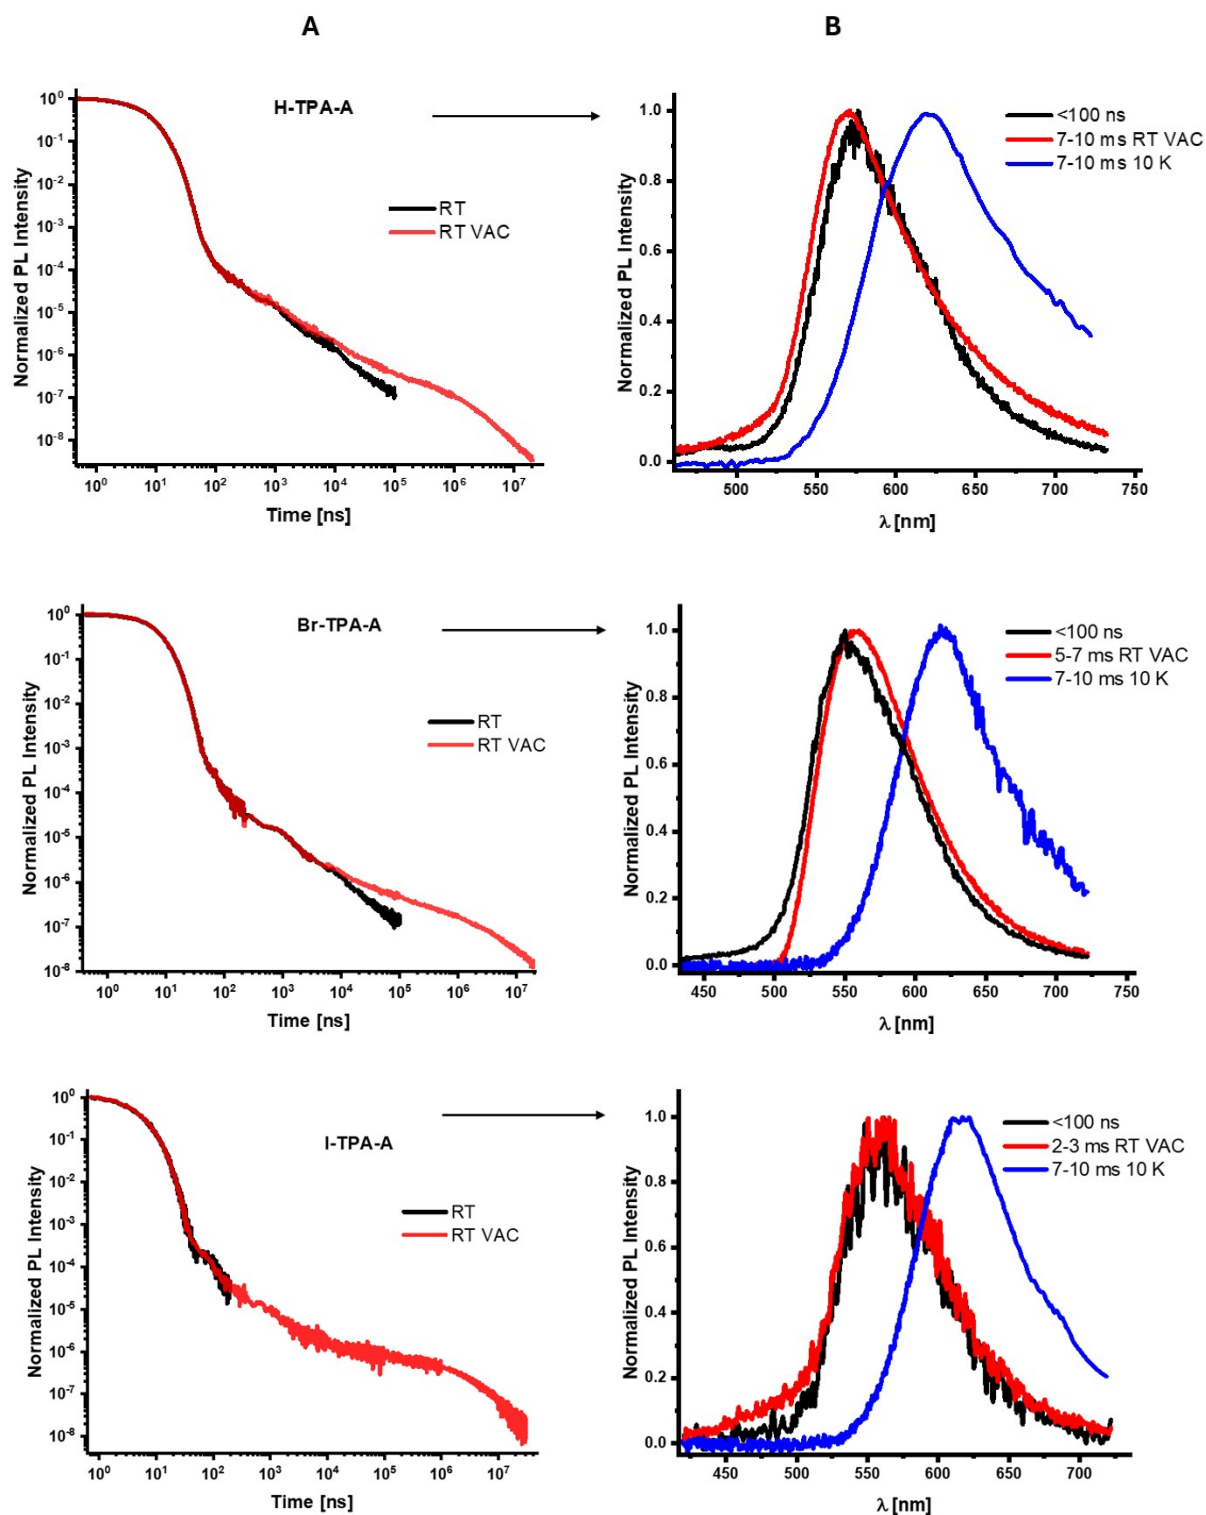

**Figure S7.** The PL decays of R-TPA-A in ZNX films (A) and PL spectra for different time regime (B). Blue line represents phosphorescence detected in 10 K.

### Section S3. Calculation results

**Table S1.** Energy levels [eV] of HOMO and LUMO in  $S_0$ .

|                 | structure | HOMO  | LUMO  |
|-----------------|-----------|-------|-------|
| <b>H-TPA-A</b>  | monomer   | -6.75 | -2.64 |
|                 | dimer 1   | -6.32 | -2.65 |
| <b>Br-TPA-A</b> | monomer   | -6.86 | -2.68 |
|                 | dimer 1   | -6.80 | -2.94 |
| <b>I-TPA-A</b>  | monomer   | -6.63 | -2.66 |
|                 | dimer 1   | -6.56 | -2.90 |

**Table S2.** The emission lifetimes, rate constants and decay parameters of **R-TPA-A** in ZNX films.

| condi-<br>-tions | structure | PLQY [%] | $\lambda_{\text{max, em}}$ [nm] | $\tau_{\text{PF}}$ [ns] | $\tau_{\text{DF}}$ [ $\mu\text{s}$ ] | $k_r$ [ $\cdot 10^7 \text{s}^{-1}$ ] | $k_{\text{ISC}}$ [ $\cdot 10^7 \text{s}^{-1}$ ] | $\phi_{\text{ISC}}$ [%] | $k_{\text{nr}}$ [ $\cdot 10^7 \text{s}^{-1}$ ] | $k_{\text{rISC}}$ [ $\cdot 10^2 \text{s}^{-1}$ ] | $\Delta E_{\text{ST}}$ [eV] |
|------------------|-----------|----------|---------------------------------|-------------------------|--------------------------------------|--------------------------------------|-------------------------------------------------|-------------------------|------------------------------------------------|--------------------------------------------------|-----------------------------|
| ZNX<br>film      | H-TPA-A   | 99       | 570                             | 7.1                     | 3505                                 | 13                                   | 0.8                                             | 6                       | 0.1                                            | 3.0                                              | 0.121                       |
|                  | Br-TPA-A  | 99       | 555                             | 5.4                     | 5045                                 | 16                                   | 2.1                                             | 11                      | 0.2                                            | 2.2                                              | 0.196                       |
|                  | I-TPA-A   | 67       | 560                             | 4.7                     | 5385                                 | 10                                   | 6.9                                             | 32                      | 4.8                                            | 2.7                                              | 0.193                       |

**Table S3.** Variants of dimers with Gibbs energy of formation ( $\Delta G$ ) for **R-TPA-A**.

| H-TPA-A    | dimer 1                                                                             | dimer 2                                                                              |
|------------|-------------------------------------------------------------------------------------|--------------------------------------------------------------------------------------|
| structure  | 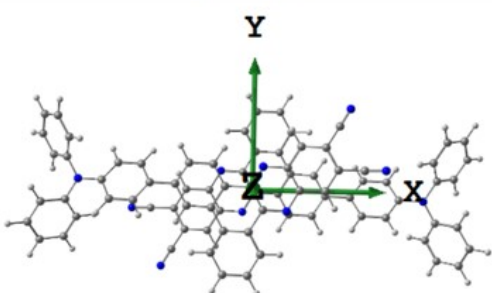 |  |
| $\Delta G$ | -0.613                                                                              | -0.065                                                                               |

Table S3 continued

|                              | dimer 1 | dimer 2 |
|------------------------------|---------|---------|
| <b>Br-TPA-A</b>              |         |         |
| <b>structure</b>             |         |         |
| <b><math>\Delta G</math></b> | -0.612  | -0.205  |
| <b>I-TPA-A</b>               |         |         |
| <b>structure</b>             |         |         |
| <b><math>\Delta G</math></b> | -0.674  | -0.233  |

Table S3 continued

| Br-TPA-A   | dimer 3 | dimer 4 | dimer 5 |
|------------|---------|---------|---------|
| structure  |         |         |         |
| $\Delta G$ | -0.577  | -0.218  | -0.282  |
| I-TPA-A    | dimer 3 | dimer 4 | dimer 5 |
| structure  |         |         |         |
| $\Delta G$ | -0.531  | -0.560  | -0.336  |

\*Gibbs energy of dimer formation [eV]

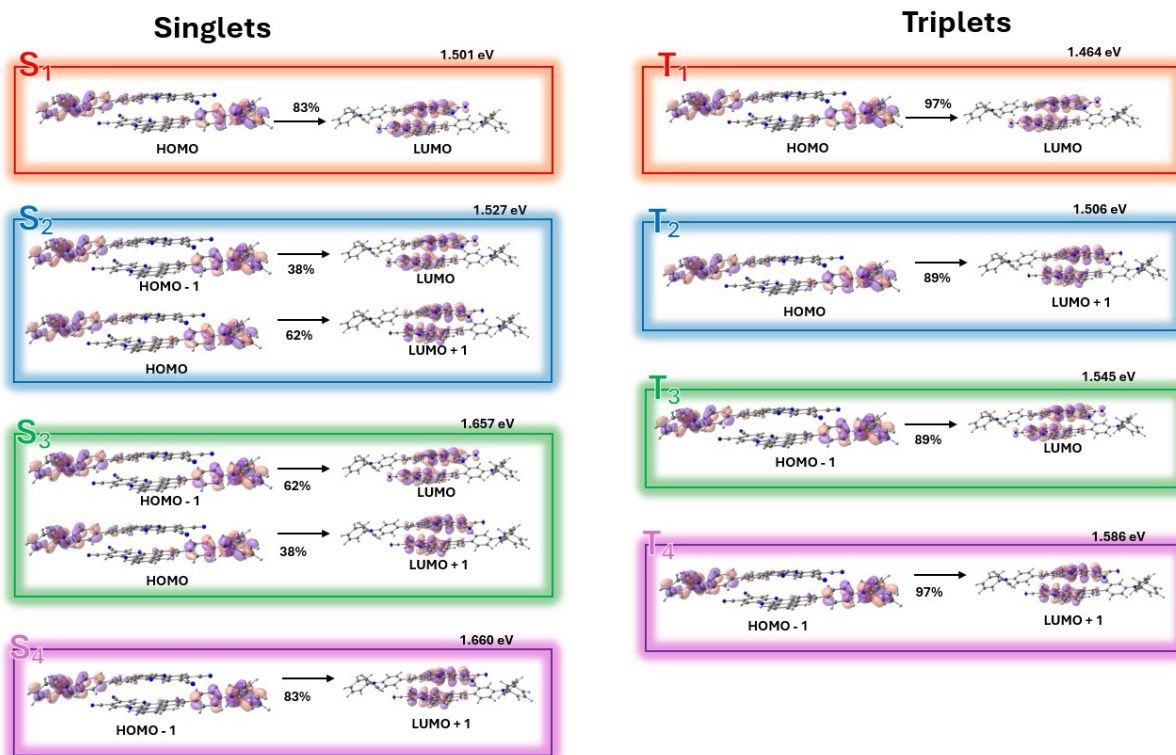

**Figure S8.** MO (molecule orbitals) for singlet ( $S_1$ - $S_4$ ) and triplet ( $T_1$ - $T_4$ ) states of **H-TPA-A**.

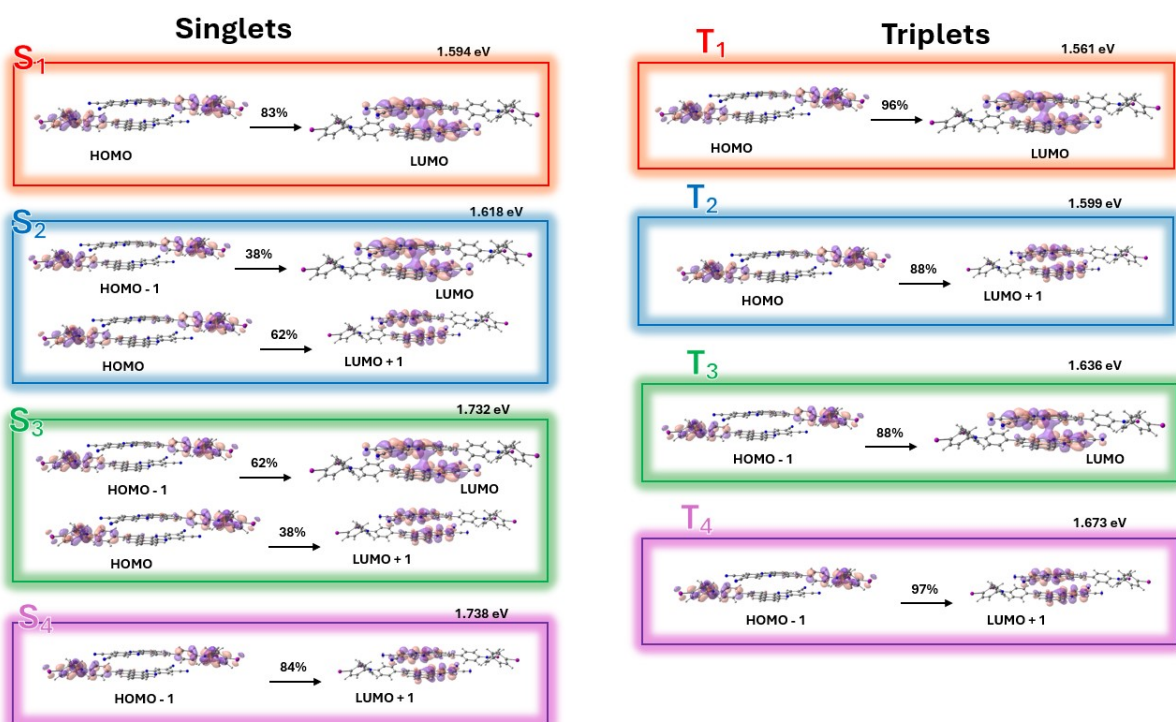

**Figure S9.** MO for singlet ( $S_1$ - $S_4$ ) and triplet ( $T_1$ - $T_4$ ) states of **I-TPA-A**.

#### Section S4. NMR, MALDI-TOF spectra of synthesized compounds

##### 3-(4-(bis(4-bromophenyl)amino)phenyl)dibenzo[a,c]phenazine-11,12-dicarbonitrile (**Br-TPA-A**)

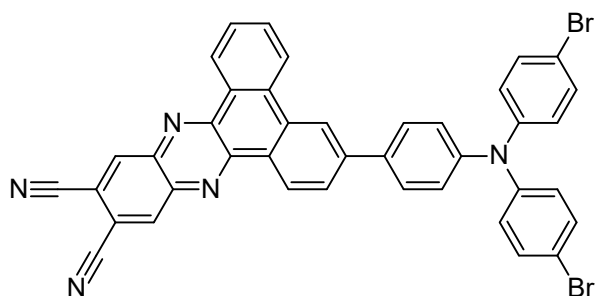

Red solid (55 mg, 87%).  $^1\text{H NMR}$  (500 MHz,  $\text{CDCl}_3-d$ ): d ppm 7.05 (d,  $J=8.80$  Hz, 4 H), 7.21 (m, 2 H), 7.42 (d,  $J=8.89$  Hz, 4 H), 7.73 (d,  $J=8.62$  Hz, 2 H), 7.83 (td,  $J=7.98$ , 0.82 Hz, 1 H), 7.93 (td,  $J=8.16$ , 0.82 Hz, 1 H), 7.99 (d,  $J=8.53$  Hz, 1 H), 8.66 (d,  $J=8.34$  Hz, 1 H), 8.73 (s, 1 H), 8.79 (s, 2 H), 9.37 (d,  $J=8.25$  Hz, 2 H); MALDI-TOF-MS:  $m/z$  calcd for  $\text{C}_{40}\text{H}_{21}\text{Br}_2\text{N}_5$  731.45, found 731.0  $[M]^+$ . Anal. Calcd., %: C 65.68; H 2.89; N 9.57. Found, %: C 65.59; H 2.92; N 9.56.

##### 3-(4-(bis(4-iodophenyl)amino)phenyl)dibenzo[a,c]phenazine-11,12-dicarbonitrile (**I-TPA-A**)

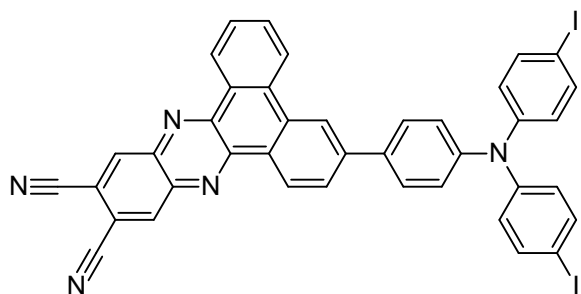

Dark red solid (57 mg, 79%).  $^1\text{H NMR}$  (500 MHz,  $\text{CDCl}_3-d$ ): d ppm 6.93 (d,  $J=8.53$  Hz, 4 H), 7.21 (m, 2 H), 7.60 (d,  $J=8.34$  Hz, 4 H), 7.73 (d,  $J=5.78$  Hz, 2 H), 7.81 (t,  $J=7.43$ , 1 H), 7.92 (t,  $J=7.70$ , 1 H), 7.98 (d,  $J=8.53$  Hz, 1 H), 8.65 (d,  $J=8.07$  Hz, 1 H), 8.72 (br. s., 1 H), 8.77 (s, 2 H), 9.35 (d,  $J=7.15$  Hz, 2 H); MALDI-TOF-MS:  $m/z$  calcd for  $\text{C}_{40}\text{H}_{21}\text{I}_2\text{N}_5$  825.45, found 827.0  $[M+1]^+$ . Anal. Calcd., %: C 58.20; H 2.56; N 8.48. Found, %: C 58.01; H 2.61; N 8.42.

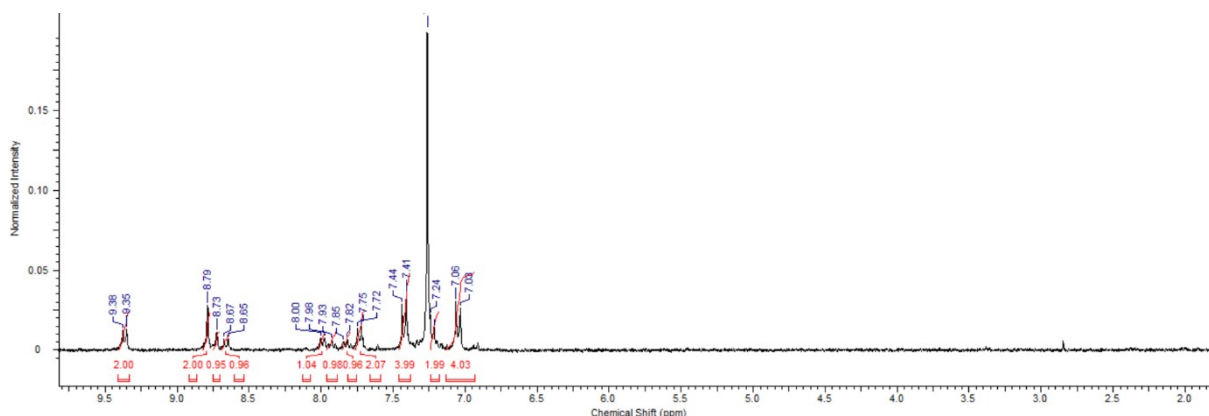

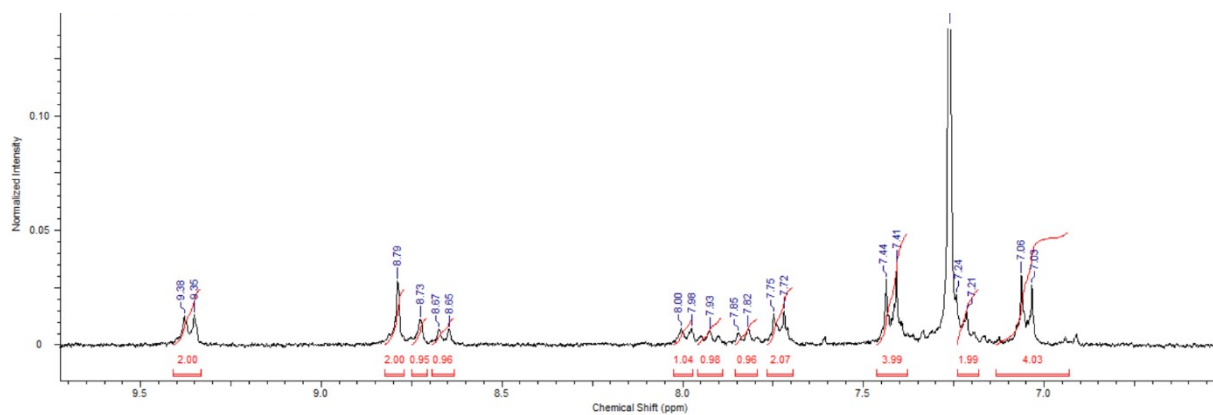

**Figure S10.** <sup>1</sup>H NMR spectra of 3-(4-(bis(4-bromophenyl)amino)phenyl)dibenzo[*a,c*]-phenazine-11,12-dicarbonitrile (**Br-TPA-A**) in CDCl<sub>3</sub>.

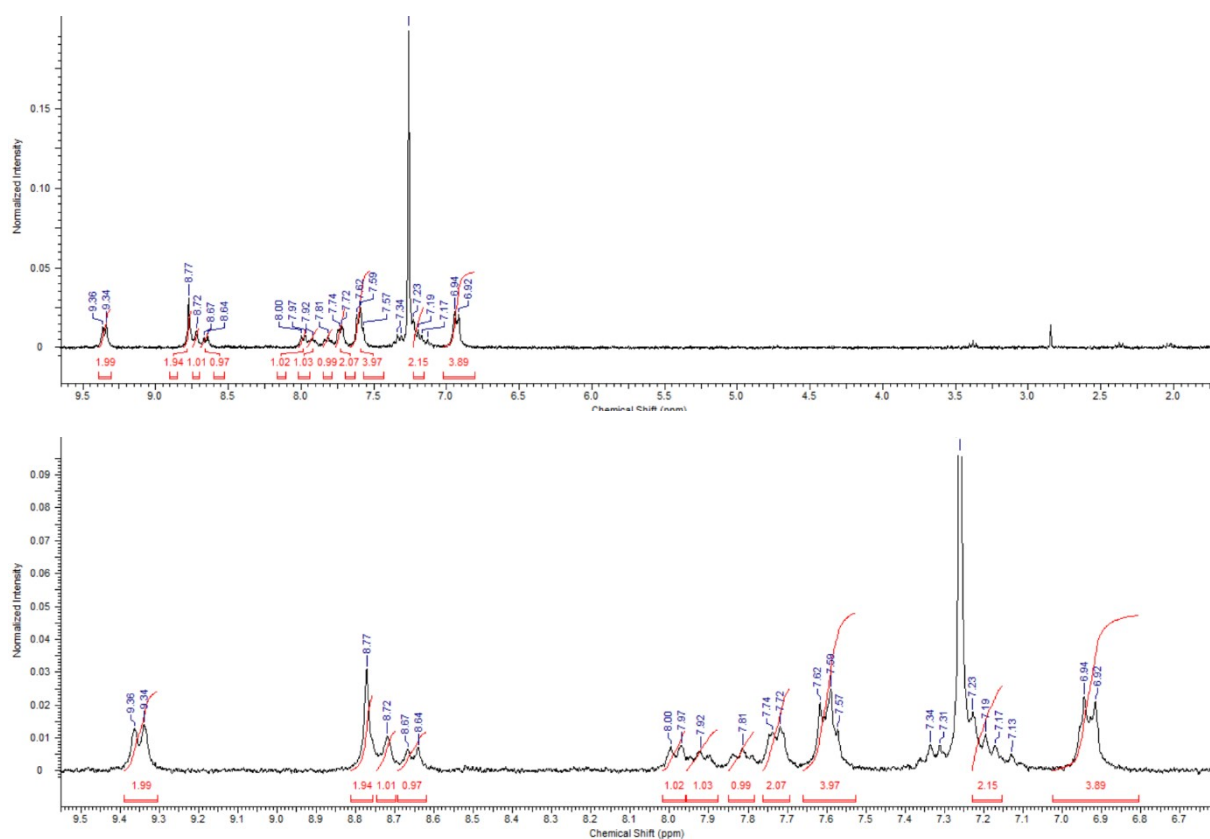

**Figure S11.** <sup>1</sup>H NMR spectra of 3-(4-(bis(4-iodophenyl)amino)phenyl)dibenzo[*a,c*]-phenazine-11,12-dicarbonitrile (**I-TPA-A**) in CDCl<sub>3</sub>.

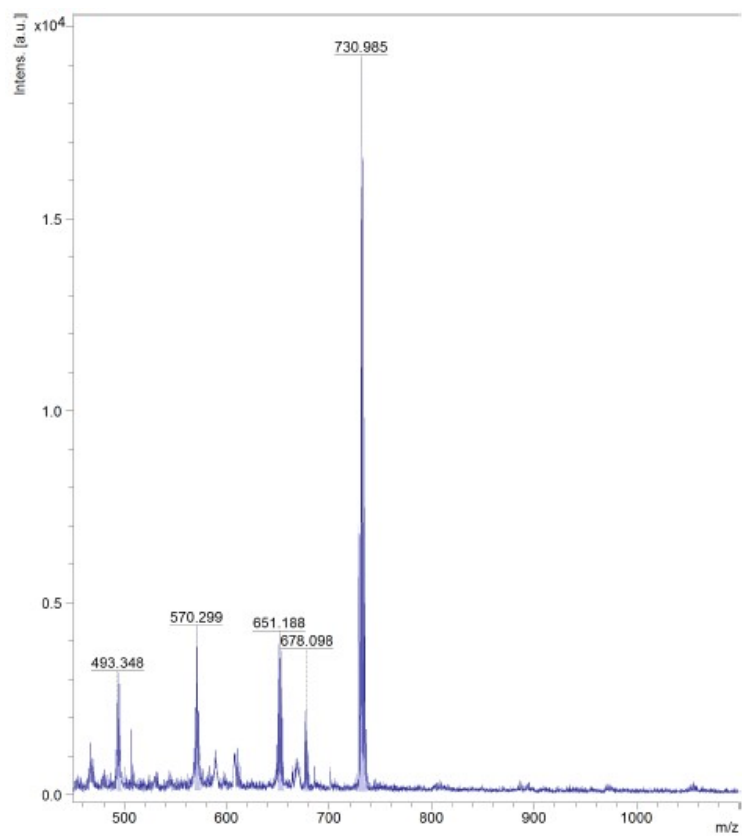

**Figure S12.** MALDI-TOF mass spectrum of **Br-TPA-A**.

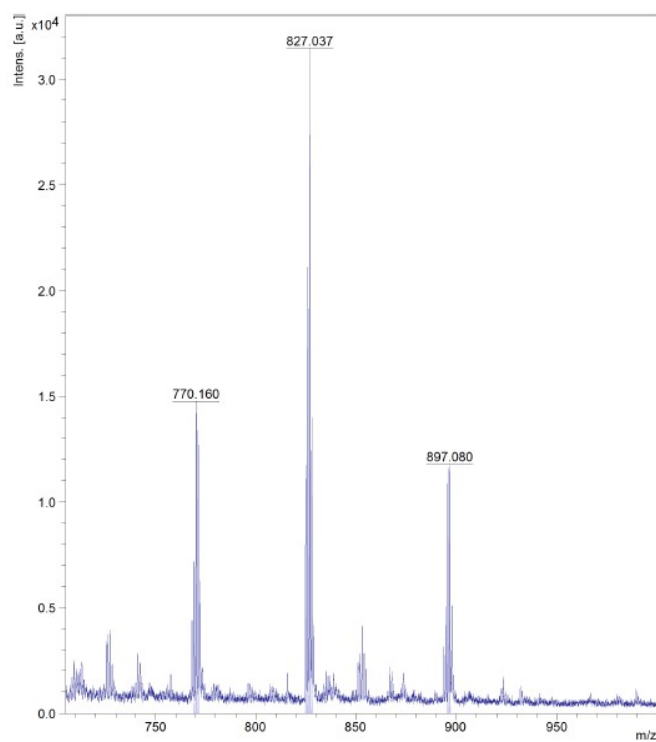

**Figure S13.** MALDI-TOF mass spectrum of **I-TPA-A**.
